# Supplementary material for: One-Step Fabrication of Hot-Water-Repellent Surfaces
Source: MDPI journal article supplement (doi:10.3390/biomimetics7020072), 2022-06-04
Supplement: s1 [file s1]

# One-step Fabrication of Hot-Water Repellent Surfaces

## Supplimentary Material

Yahua Liu <sup>1,2</sup>, Zhixin Feng <sup>1</sup>, Haiyang Zhan <sup>1</sup>, Wenna Ge <sup>1</sup>, Yuhang Xia <sup>1</sup>, Junqiu Zhang <sup>2</sup>, Shile Feng <sup>1,\*</sup>

<sup>1</sup> Key Laboratory for Precision & Non-traditional Machining Technology of Ministry of Education, Dalian University of Technology, Dalian 116024, China; fengshile@dlut.edu.cn

<sup>2</sup> Key Laboratory of Bionic Engineering, Ministry of Education, Jilin University, Changchun 130022, China

\* Correspondence: fengshile@dlut.edu.cn; Tel.: 18811434728

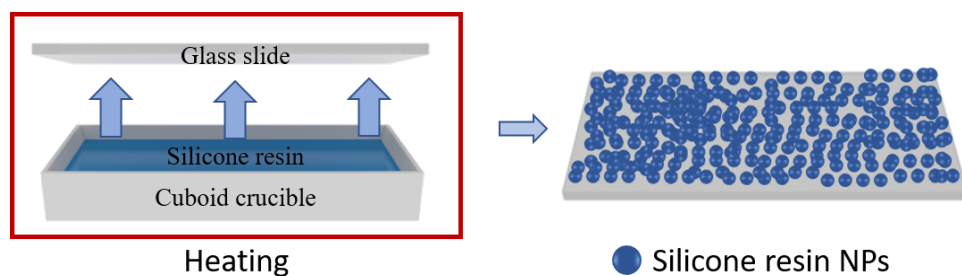

**Figure S1.** Schematic showing the surface fabrication process.

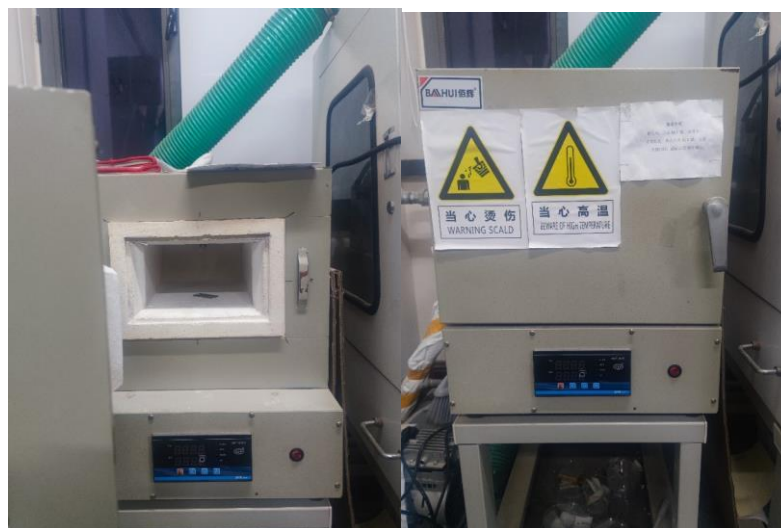

**Figure S2.** Image of muffle furnace with a temperature sensor.



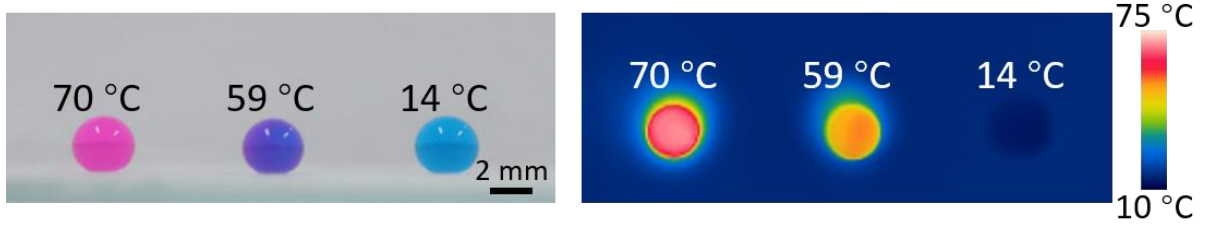

**Figure S6.** Optical and infrared images of high temperature droplets on the surface fabricated at  $T_d = 390\text{ }^{\circ}\text{C}$  (The droplets are stained with food coloring for differentiation, and the background temperature is  $18\text{ }^{\circ}\text{C}$ ).

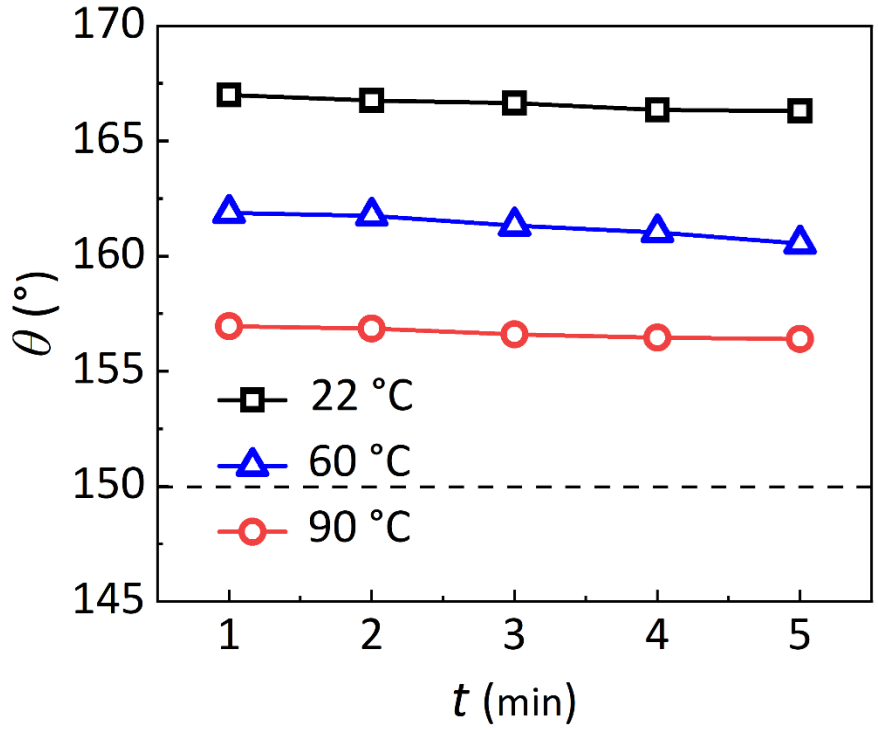

**Figure S7.** The change of contact angle with the increase of time during the natural cooling of high-temperature droplets.

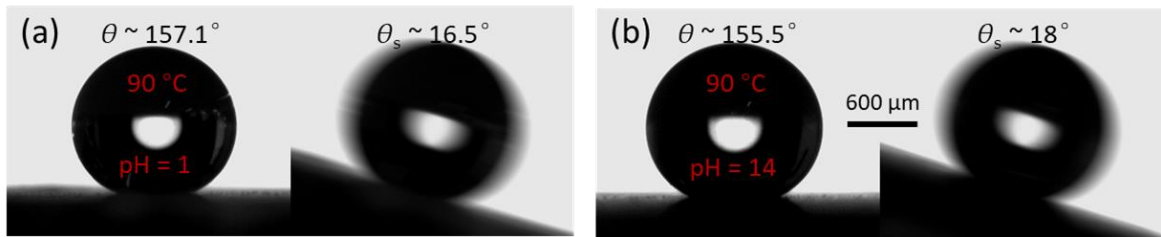

**Figure S8.** The  $\theta$  and  $\theta_s$  of hot acid and hot base on the HWRS: (a) acid, (b) base.

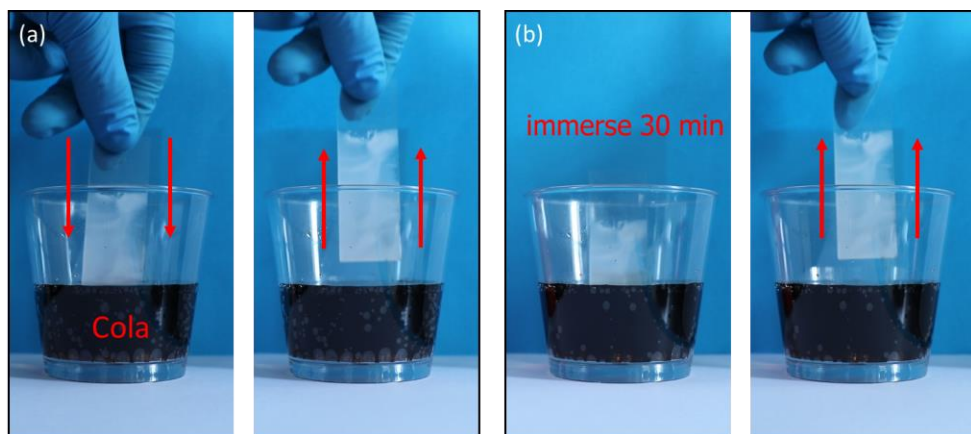

**Figure S9.** The antifouling test of HWRS: (a) immersed in cola and take out; (b) immersed in cola for 30 min and take out.

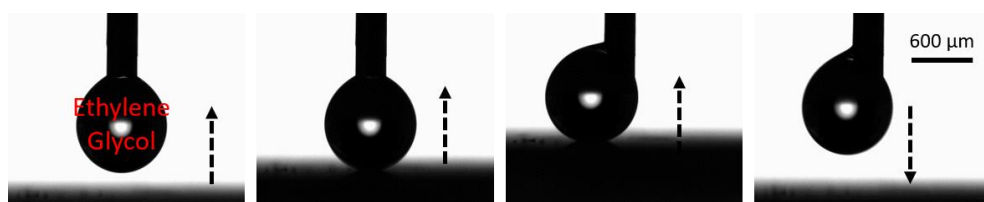

**Figure S10.** Low adhesion between HWRS and ethylene glycol droplet.

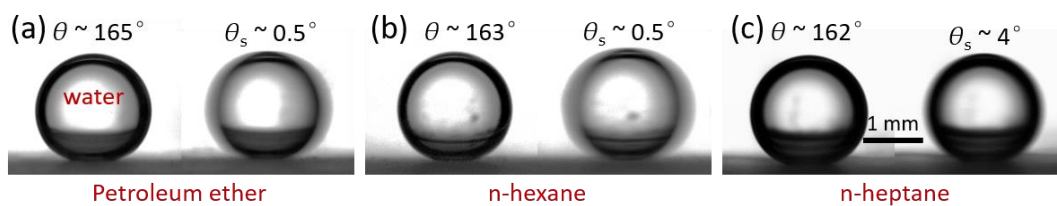

**Figure S11.** The  $\theta$  and  $\theta_s$  of water on the HWRS immersed in oil: (a) petroleum ether, (b) n-hexane, and (c) n-heptane.

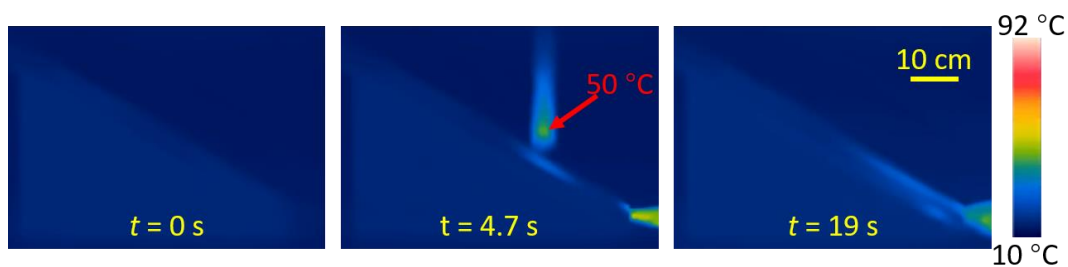

**Figure S12.** Sequential images showing the self-cleaning property of the HWRS by an infrared camera.

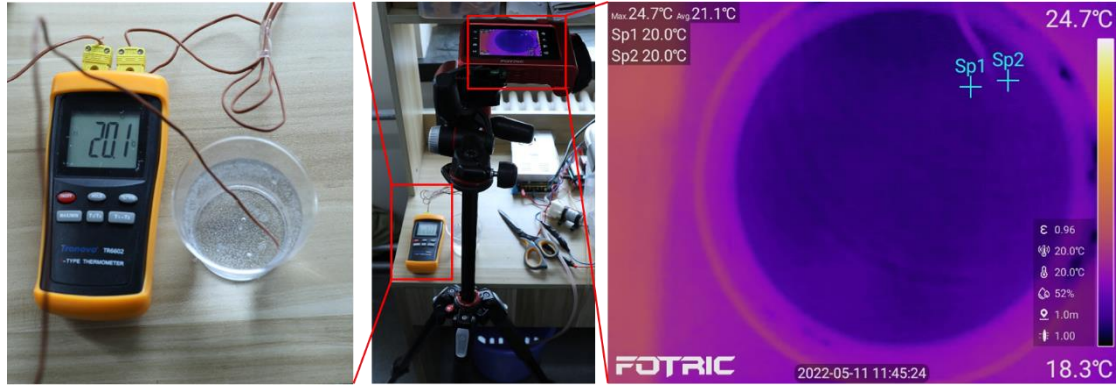

**Figure S13.** The calibration of the infrared camera: Firstly, the liquid temperature was measured by k-type thermocouples, and then the infrared camera was adjusted to make the temperature in the thermal imaging consistent with the measured temperature. .
